# Supplementary material for: 1,4-Dihydroxyanthraquinone–copper(ii) supported on superparamagnetic Fe3O4@SiO2: an efficient catalyst for N-arylation of nitrogen heterocycles and alkylamines with aryl halides and click synthesis of 1-aryl-1,2,3-triazole derivatives
Source: Royal Society of Chemistry journal article supplement (doi:10.1039/c6ra16646f), 2016-01-01

## Supplementary Information

### **1,4-dihydroxyanthraquinone-copper(II) supported on superparamagnetic Fe<sub>3</sub>O<sub>4</sub>@SiO<sub>2</sub>: An efficient catalyst for *N*-Arylation of nitrogen heterocycles and alkylamines with aryl halides and click synthesis of 1-aryl-1,2,3-triazole derivatives**

Saeed Zahmatkesh,<sup>\*a</sup> Mohsen Esmaeilpour,<sup>\*b</sup> Jaber Javidi,<sup>c,d</sup>

<sup>a</sup>Department of Science, Payame Noor University (PNU), Tehran, Islamic Republic of Iran

<sup>b</sup>Chemistry Department, College of Science, Shiraz University, Shiraz, Iran

<sup>c</sup>Department of Pharmaceutics, School of Pharmacy, Shahid Beheshti University of Medical Sciences, Tehran, Iran

<sup>d</sup>Students Research Committee, School of Pharmacy, ShahidBeheshti University of Medical Sciences, Tehran, Iran

\*Corresponding author. Tel.: +98 7116137738, fax: +98 7112286008.

E-mail address: [zahmatkesh1355@yahoo.com](mailto:zahmatkesh1355@yahoo.com) (S. Zahmatkesh); [m1250m551085@yahoo.com](mailto:m1250m551085@yahoo.com) (M. Esmaeilpour)

**1-Phenyl-1H-imidazole (3a)**

Dark brown oil, <sup>1</sup>H NMR (250 MHz, CDCl<sub>3</sub>): δ= 7.14-7.45 (m, 7 H), 7.80 (s, 1 H); <sup>13</sup>C NMR (62.9 MHz, CDCl<sub>3</sub>): δ= 118.2, 121.4, 127.5, 129.9, 130.4, 135.5, 137.4.

**2-Imidazol-1-ylpyridine (3g)**

Dark brown oil, <sup>1</sup>H NMR (250 MHz, CDCl<sub>3</sub>): δ= 7.14-7.20 (m, 2 H), 7.28-7.34 (m, 1 H), 7.25-7.34 (m, 1 H), 7.58 (s, 1 H), 7.73-7.80 (m, 1 H), 8.28 (s, 1 H), 8.41-8.43 (m, 1 H); <sup>13</sup>C NMR (62.9 MHz, CDCl<sub>3</sub>): δ= 112.3, 116.7, 122.0, 130.6, 132.2, 134.9, 139.0, 149.1; Anal. Calcd for C<sub>8</sub>H<sub>7</sub>N<sub>3</sub>: C, 66.19; H, 4.86; N, 28.95%. Found: C, 65.89; H, 4.97; N, 29.14%.

**1-Phenyl-1H-indole (3h)**

Dark brown oil, <sup>1</sup>H NMR (250 MHz, CDCl<sub>3</sub>): δ= 6.59-6.63 (m, 1 H), 7.06-7.17 (m, 2 H), 7.25-7.30 (m, 2 H), 7.41-7.52 (m, 5 H), 7.59-7.64 (m, 1 H); <sup>13</sup>C NMR (62.9 MHz, CDCl<sub>3</sub>): δ= 103.6, 110.5, 120.4, 121.1, 122.4, 124.4, 126.4, 128.0, 129.3, 129.6, 135.8, 139.8; Anal. Calcd for C<sub>14</sub>H<sub>11</sub>N: C, 87.01; H, 5.75; N 7.25%. Found: C, 86.91; H, 5.86; N, 7.23%.

**1-p-Tolyl-1H-indole (3i)**

Dark brown oil, <sup>1</sup>H NMR (250 MHz, CDCl<sub>3</sub>): δ= 2.35 (s, 3 H), 6.58 (dd, *J*= 4.2 Hz, 1 H), 7.04-7.32 (m, 7 H), 7.43-7.47 (m, 1 H), 7.58-7.62 (m, 1 H); <sup>13</sup>C NMR (62.9 MHz, CDCl<sub>3</sub>): δ= 21.1, 103.2, 110.5, 120.1, 121.1, 122.2, 124.3, 128.1, 129.2, 130.1, 136.3, 137.3; Anal. Calcd for C<sub>15</sub>H<sub>13</sub>N: C, 86.92; H, 6.32; N, 6.76%. Found: C, 86.57; H, 6.55; N, 6.88%.

**1-Pyridin-2-yl-1H-indole (3j)**

Dark brown oil, <sup>1</sup>H NMR (250 MHz, CDCl<sub>3</sub>): δ= 6.56 (d, *J*= 3.5 Hz, 1 H), 6.97 (t, *J*= 6.0 Hz, 1 H), 7.00-7.25 (m, 3 H), 7.49-7.56 (m, 3 H), 8.09 (d, *J*= 8.2 Hz, 1 H), 8.36-8.39 (m, 1 H); <sup>13</sup>C NMR (62.9 MHz, CDCl<sub>3</sub>): δ= 105.7, 113.3, 114.6, 120.2, 121.2, 121.5, 123.3, 126.1, 130.6, 135.2, 138.5, 149.0, 152.5; Anal. Calcd for C<sub>13</sub>H<sub>10</sub>N<sub>2</sub>: C, 80.39; H, 5.19; N, 14.42%. Found: C, 80.57; H, 5.09; N, 14.34%.

**2-Methyl-1-phenyl-1H-indole (3k)**

Dark brown oil, <sup>1</sup>H NMR (250 MHz, CDCl<sub>3</sub>): δ= 2.22 (s, 3 H), 6.32 (s, 1 H), 7.00-7.07 (m, 3 H), 7.25-7.29 (m, 2 H), 7.36-7.51 (m, 4 H); <sup>13</sup>C NMR (62.9 MHz, CDCl<sub>3</sub>): δ= 13.4, 101.3, 110.0, 119.6, 120.0, 121.0, 127.7, 128.0, 128.2, 129.4, 137.0, 138.2; Anal. Calcd for C<sub>15</sub>H<sub>13</sub>N: C, 86.92; H, 6.32; N, 6.76%. Found: C, 86.72; H, 6.45; N, 6.83%.

**1-Phenyl-1H-benzimidazole (3l)**

Brown oil, <sup>1</sup>H NMR (250 MHz, CDCl<sub>3</sub>): δ= 7.32-7.36 (m, 2 H), 7.44-7.61 (m, 6 H), 7.89-7.90 (m, 1 H), 8.17 (s, 1 H); <sup>13</sup>C NMR (62.9 MHz, CDCl<sub>3</sub>): δ= 110.5, 120.6, 122.8, 123.7, 124.0, 128.0, 130.0, 136.3, 142.8, 144.2; Anal. Calcd for C<sub>13</sub>H<sub>10</sub>N<sub>2</sub>: C, 80.39; H, 5.19; N, 14.42%. Found: C, 80.51; H, 5.01; N, 14.48%.

**1-Pyridin-2-yl-1H-benzimidazole (3n)**

Brown oil, <sup>1</sup>H NMR (250 MHz, CDCl<sub>3</sub>): δ= 7.26-7.39 (m, 3 H), 7.58 (d, *J*= 8.2 Hz, 1 H), 7.86-7.93 (m, 2 H), 8.06 (d, *J*= 7.8 Hz, 1 H), 8.58-8.62 (m, 2 H); <sup>13</sup>C NMR (62.9 MHz, CDCl<sub>3</sub>): δ= 112.6, 114.3, 120.6, 121.8, 123.3, 124.2, 132.1, 138.9, 141.3, 144.7, 149.5, 149.9; Anal. Calcd for C<sub>12</sub>H<sub>9</sub>N<sub>3</sub>: C, 73.83; H, 4.65; N, 21.52%. Found: C, 73.62; H, 4.76; N, 21.62%.

**1-Phenyl-1H-pyrrole (3o)**

Dark brown oil,  $^1\text{H}$  NMR (250 MHz,  $\text{CDCl}_3$ ):  $\delta$ = 6.27 (t,  $J$ = 4.5 Hz, 2 H), 7.00 (t,  $J$ = 4.5 Hz, 2 H), 7.12-7.18 (m, 1 H), 7.28-7.33 (m, 4 H);  $^{13}\text{C}$  NMR (62.9 MHz,  $\text{CDCl}_3$ ):  $\delta$ = 110.6, 119.4, 120.6, 125.7, 129.7, 140.9; Anal. Calcd for  $\text{C}_{10}\text{H}_9\text{N}$ : C, 83.88; H, 6.34; N, 9.78%. Found: C, 83.64; H, 6.43; N, 9.93%.

### 1,4-Diphenylpiperazine (3p)

Dark brown solid, mp 149-150 °C,  $^1\text{H}$  NMR (250 MHz,  $\text{CDCl}_3$ ):  $\delta$ = 3.36 (s, 8 H), 6.88-7.02 (m, 6 H), 7.28-7.34 (m, 4 H);  $^{13}\text{C}$  NMR (62.9 MHz,  $\text{CDCl}_3$ ):  $\delta$ = 49.5, 116.4, 120.1, 129.2, 151.3; Anal. Calcd for  $\text{C}_{16}\text{H}_{18}\text{N}_2$ : C, 80.63; H, 7.61; N, 11.75%. Found: C, 80.89; H, 7.52; N, 11.59%.

### 1-Phenyl-4-pyridin-2-ylpiperazine (3r)

Light brown solid, mp 100-101 °C,  $^1\text{H}$  NMR (250 MHz,  $\text{CDCl}_3$ ):  $\delta$ = 3.24 (dd,  $J^1$ = 7.0 Hz,  $J^2$ = 5.0 Hz, 4 H), 3.64 (t,  $J$ = 5.2 Hz, 4 H), 6.56-6.65 (m, 2 H), 6.79-6.93 (m, 3H), 7.18-7.25 (m, 2 H), 7.40-7.47 (m, 1 H), 8.14-8.16 (m, 1 H);  $^{13}\text{C}$  NMR (62.9 MHz,  $\text{CDCl}_3$ ):  $\delta$ = 45.3, 49.2, 107.2, 113.6, 116.3, 120.1, 129.2, 137.6, 148.0, 151.3, 159.4; Anal. Calcd for  $\text{C}_{15}\text{H}_{17}\text{N}_3$ : C, 75.28; H, 7.16; N, 17.56%. Found: C, 75.38; H, 7.27; N, 17.35%.

### N,N-Dibutylaniline (3s)

Black oil,  $^1\text{H}$  NMR (250 MHz,  $\text{CDCl}_3$ ):  $\delta$ = 0.88 (t,  $J$ = 7.5 Hz, 6 H), 1.20-1.32 (m, 4 H), 1.46-1.55 (m, 4 H), 3.18 (t,  $J$ = 7.5 Hz, 4 H), 6.54-6.58 (m, 3 H), 7.09-7.17 (m, 2 H);  $^{13}\text{C}$  NMR (62.9 MHz,  $\text{CDCl}_3$ ):  $\delta$ = 14.0, 20.4, 29.4, 50.8, 111.6, 115.0, 129.2, 148.2;

### N,N-Diethylaniline (3t)

Dark brown oil,  $^1\text{H}$  NMR (250 MHz,  $\text{CDCl}_3$ ):  $\delta$ = 1.18 (t, 6 H), 3.37 (q, 4 H), 6.63-6.73 (m, 3 H), 7.20-7.27 (m, 2 H);  $^{13}\text{C}$  NMR (62.9 MHz,  $\text{CDCl}_3$ ):  $\delta$ = 12.6, 44.3, 111.8, 115.3, 129.3, 147.8; Anal. Calcd for  $\text{C}_{10}\text{H}_{15}\text{N}$ : C, 80.48; H, 10.13; N, 9.39%. Found: C, 80.25; H, 10.03; N, 9.72%.

**1,4-Diphenyl-1H-1,2,3-triazole (7a)**: White solid; mp: 174-175 °C (175-177 °C)<sup>58</sup>;  $^1\text{H}$  NMR (250 MHz,  $\text{CDCl}_3$ )  $\delta$ : 7.26 (d,  $J$ = 1.6 Hz, 1H), 7.38 (t,  $J$ = 7.6 Hz, 1H), 7.47 (t,  $J$ =7.6 Hz, 2H), 7.56 (t,  $J$ = 8.0 Hz, 2H), 7.81 (d,  $J$ = 8.0 Hz, 2H), 7.93 (d,  $J$ = 7.6 Hz, 2H), 8.20 (s, 1H);  $^{13}\text{C}$  NMR (62.9 MHz,  $\text{CDCl}_3$ )  $\delta$ : 117.6, 120.6, 125.9, 128.4, 128.8, 128.9, 129.8, 130.3, 137.1, 148.5; IR (KBr,  $\text{Cm}^{-1}$ ): 3118, 2919, 2356, 1729, 1463, 1236, 1070.

**1-(4-Hydroxyphenyl)-4-phenyl-1H-1,2,3-triazole (7b)**: White solid; mp: 207-208 °C (206-208 °C)<sup>58</sup>;  $^1\text{H}$  NMR (250 MHz,  $\text{CD}_3\text{OD}$ )  $\delta$ : 6.96 (d,  $J$ = 9.2 Hz, 2H), 7.37 (t,  $J$ = 6.0 Hz, 1H), 7.46 (t,  $J$ = 7.6 Hz, 2H), 7.68 (d,  $J$ = 6.4 Hz, 2H), 7.91 (d,  $J$ = 7.2 Hz, 2H), 8.75 (s, 1H);  $^{13}\text{C}$  NMR (62.9 MHz,  $\text{DMSO}-d_6$ )  $\delta$ : 116.0, 119.5, 121.9, 125.3, 128.1, 128.8, 128.9, 130.4, 146.9, 157.8; IR (KBr,  $\text{Cm}^{-1}$ ): 3135, 1603, 1520, 1229, 1055.

**1-(4-Methoxyphenyl)-4-phenyl-1H-1,2,3-triazole (7c)**: White solid; mp: 156-157 °C (155-159 °C)<sup>58</sup>;  $^1\text{H}$  NMR (250 MHz,  $\text{CDCl}_3$ )  $\delta$ : 3.89, (s, 3H), 7.06 (d,  $J$ = 7.2 Hz, 2H), 7.35 (t,  $J$ = 7.2 Hz, 1H), 7.46 (t,  $J$ = 7.4 Hz, 2H), 7.71 (d,  $J$ = 7.4 Hz, 2H), 7.92 (d,  $J$ = 7.2 Hz), 8.11 (s, 1H); IR (KBr,  $\text{Cm}^{-1}$ ): 3133, 2956, 2356, 1722, 1517, 1229, 1041.

**1-(4-Phenoxy-phenyl)-4-phenyl-1H-1,2,3-triazole (7d)**: White solid; mp: 170-171 °C (171-173 °C)<sup>58</sup>;  $^1\text{H}$  NMR (250 MHz,  $\text{CDCl}_3$ )  $\delta$ : 7.08 (d,  $J$ = 8.5 Hz, 2H), 7.16 (m, 3H), 7.34 (m, 3H), 7.44 (t,  $J$ = 7.7 Hz, 2H), 7.74 (d,  $J$ = 8.9 Hz, 2H), 7.92 (d,  $J$ = 8.3 Hz, 2H), 8.15 (s, 1H);

$^{13}\text{C}$  NMR (62.9 MHz,  $\text{CDCl}_3$ )  $\delta$ : 117.8, 119.3, 119.5, 122.3, 124.2, 125.9, 128.4, 128.9, 130.0, 132.3, 148.4, 156.4, 158.0; IR (KBr,  $\text{Cm}^{-1}$ ): 3125, 2923, 2356, 1585, 1511, 1247.

**1-(3-Formylphenyl)-4-phenyl-1H-1,2,3-triazole (7e)**: White solid; mp: 164-166 °C (162-165 °C)<sup>58</sup>;  $^1\text{H}$  NMR (250 MHz,  $\text{CDCl}_3$ )  $\delta$ : 7.41 (t,  $J$ = 4.0 Hz, 1H), 7.50 (t,  $J$ = 5.6 Hz, 2H), 7.77 (t,  $J$ = 8.0 Hz, 1H), 7.94 (d,  $J$ = 7.2 Hz, 2H), 7.99 (d,  $J$ = 7.6 Hz, 1H), 8.19 (d,  $J$ = 7.2 Hz, 1H), 8.30 (d,  $J$ = 7.61 Hz, 2H), 10.13 (s, 1H);  $^{13}\text{C}$  NMR (62.9 MHz,  $\text{CDCl}_3$ )  $\delta$ : 117.4, 120.1, 125.9, 128.7, 129.0, 129.9, 130.6, 130.8, 137.7, 137.8, 148.9, 190.8; IR (KBr,  $\text{Cm}^{-1}$ ): 3137, 2817, 1703, 1597, 1238, 1011.

**1-Thiophen-3-yl-4-phenyl-1H-1,2,3-triazole (7f)**: White solid; mp: 166-167 °C (164-166 °C)<sup>58</sup>;  $^1\text{H}$  NMR (250 MHz,  $\text{CDCl}_3$ )  $\delta$ : 7.32-7.38 (m, 1H), 7.44 (m, 1H), 7.48-7.50 (m, 1H), 7.52-7.53 (m, 1H), 7.61-7.62 (q,  $J$ = 1.2, 3.2 Hz, 1H), 7.68 (m, 1H), 7.90 (s, 1H), 7.92 (d,  $J$ = 1.6 Hz, 1H), 8.11 (s, 1H);  $^{13}\text{C}$  NMR (62.9 MHz,  $\text{CDCl}_3$ )  $\delta$ : 114.1, 118.0, 120.9, 125.9, 127.3, 128.5, 128.9, 130.2, 135.9, 148.0; IR (KBr,  $\text{Cm}^{-1}$ ): 3107, 1559, 1445, 1229, 1072.

**1-(4-Hydroxyphenyl)-4-cyclohexyl-1H-1,2,3-triazole (7g)**: White solid; mp: 169-170 °C (167-169 °C)<sup>58</sup>;  $^1\text{H}$  NMR (250 MHz,  $\text{CDCl}_3$ )  $\delta$ : 1.23-1.35 (m, 2H), 1.38-1.50 (m, 3H), 1.76 (m, 1H), 1.85 (m, 2H), 2.14 (m, 2H), 2.86 (m, 1H), 6.25 (brs, OH), 7.03 (d,  $J$ = 8.8 Hz, 2H), 7.56-7.60 (m, 3H);  $^{13}\text{C}$  NMR (62.9 MHz,  $\text{CDCl}_3$ )  $\delta$ : 26.0, 26.1, 33.0, 35.2, 116.6, 118.1, 122.2, 130.0, 154.0, 157.4; IR (KBr,  $\text{Cm}^{-1}$ ): 3141, 2928, 2358, 1601, 1517, 1225, 1063.

**1-(4-Methoxyphenyl)-4-cyclohexyl-1H-1,2,3-triazole (7h)**: White solid; mp: 91-92 °C (90-93 °C)<sup>58</sup>;  $^1\text{H}$  NMR (250 MHz,  $\text{CDCl}_3$ )  $\delta$ : 1.26-1.30 (m, 1H), 1.40 (m, 4H), 1.80-1.90 (m, 3H), 2.18 (m, 2H), 2.82 (m, 1H), 3.82 (s, 3H), 6.98 (d,  $J$ = 6.8 Hz, 2H), 7.62 (m, 3H);  $^{13}\text{C}$  NMR (62.9 MHz,  $\text{CDCl}_3$ )  $\delta$ : 26.2, 29.4, 33.1, 35.8, 55.0, 114.7, 117.2, 121.8, 132.5, 154.2, 159.6; IR (KBr,  $\text{Cm}^{-1}$ ): 3130, 2924, 2361, 1725, 1519, 1254, 1046.

**1-(Naphth-2-yl)-4-cyclohexyl-1H-1,2,3-triazole (7i)**: White solid; mp: 141-142 °C (139-141 °C)<sup>58</sup>;  $^1\text{H}$  NMR (250 MHz,  $\text{CDCl}_3$ )  $\delta$ : 1.22-1.36 (m, 1H), 1.39-1.55 (m, 4H), 1.79 (m, 1H), 1.88 (m, 2H), 2.16 (m, 2H), 2.90-2.92 (m, 1H), 7.51-7.58 (m, 2H), 7.81 (s, 1H), 7.87-7.92 (m, 3H), 8.00 (d,  $J$ = 8.8 Hz, 1H), 8.15 (s, 1H);  $^{13}\text{C}$  NMR (62.9 MHz,  $\text{CDCl}_3$ )  $\delta$ : 26.1, 26.2, 29.7, 33.0, 35.4, 117.7, 118.1, 119.0, 126.8, 127.3, 127.9, 128.2, 129.9, 132.7, 133.3, 134.8, 154.5; IR (KBr,  $\text{Cm}^{-1}$ ): 3128, 2926, 1566, 1501, 1239, 1038.

**1-(Indol-5-yl)-4-cyclohexyl-1H-1,2,3-triazole (7j)**: Light pink solid; mp: 138-139 °C (136-139 °C)<sup>58</sup>;  $^1\text{H}$  NMR (250 MHz,  $\text{CDCl}_3$ )  $\delta$ : 1.21-1.37 (m, 2H), 1.36-1.51 (m, 3H), 1.77 (m, 1H), 1.86 (m, 2H), 2.16 (m, 2H), 2.87 (m, 1H), 6.63 (t,  $J$ = 2.4 Hz, 1H), 7.33 (t,  $J$ = 2.8 Hz, 1H), 7.47-7.56 (m, 2H), 7.68 (s, 1H), 7.91 (d,  $J$ = 1.6 Hz, 1H), 8.48 (s, 1H);  $^{13}\text{C}$  NMR (62.9 MHz,  $\text{CDCl}_3$ )  $\delta$ : 26.1, 26.2, 33.1, 35.4, 103.3, 111.8, 113.2, 115.9, 118.5, 126.2, 128.0, 130.9, 135.4, 154.0; IR (KBr,  $\text{Cm}^{-1}$ ): 3349, 2921, 2360, 1444, 1223, 1046.

**1-(4-Hydroxyphenyl)-4-octyl-1H-1,2,3-triazole (7k)**: Light pink solid; mp: 99-101 °C (98-100 °C)<sup>58</sup>;  $^1\text{H}$  NMR (250 MHz,  $\text{CDCl}_3$ )  $\delta$ : 0.88 (t,  $J$ = 6.8 Hz, 3H), 1.26-1.39 (m, 10H), 1.72-1.76 (m, 2H), 2.79 (t,  $J$ = 7.6 Hz, 2H), 7.06 (d,  $J$ = 7.2 Hz, 2H), 7.58 (d,  $J$ = 6.8 Hz, 2H), 7.64 (s, 1H); 14.1, 22.7, 25.5, 29.2 (2 C), 29.3, 29.4, 31.9, 116.7, 119.5, 122.3, 129.9, 148.8, 157.8; IR (KBr,  $\text{Cm}^{-1}$ ): 3122, 2920, 1600, 1236, 1057.

**1-(4-Methoxyphenyl)-4-octyl-1H-1,2,3-triazole (7l)**: Light yellow solid; mp: 54-56 °C (53-55 °C)<sup>58</sup>;  $^1\text{H}$  NMR (250 MHz,  $\text{CDCl}_3$ )  $\delta$ : 0.94 (t,  $J$ = 6.4 Hz, 3H), 1.27-1.43 (m, 10H), 1.72

(m, 2H), 2.82 (t,  $J=7.6$  Hz, 2H), 3.89 (s, 3H), 7.03 (d,  $J=6.8$  Hz, 2H), 7.61-7.71 (m, 3H);  $^{13}\text{C}$  NMR (62.9 MHz,  $\text{CDCl}_3$ )  $\delta$ : 14.1, 22.7, 25.7, 29.4, 29.5, 29.7, 30.4, 31.9, 55.6, 114.7, 119.0, 122.4, 132.5, 149.0, 159; IR (KBr,  $\text{Cm}^{-1}$ ): 3127, 2919, 2357, 1725, 1521, 1256, 1048.

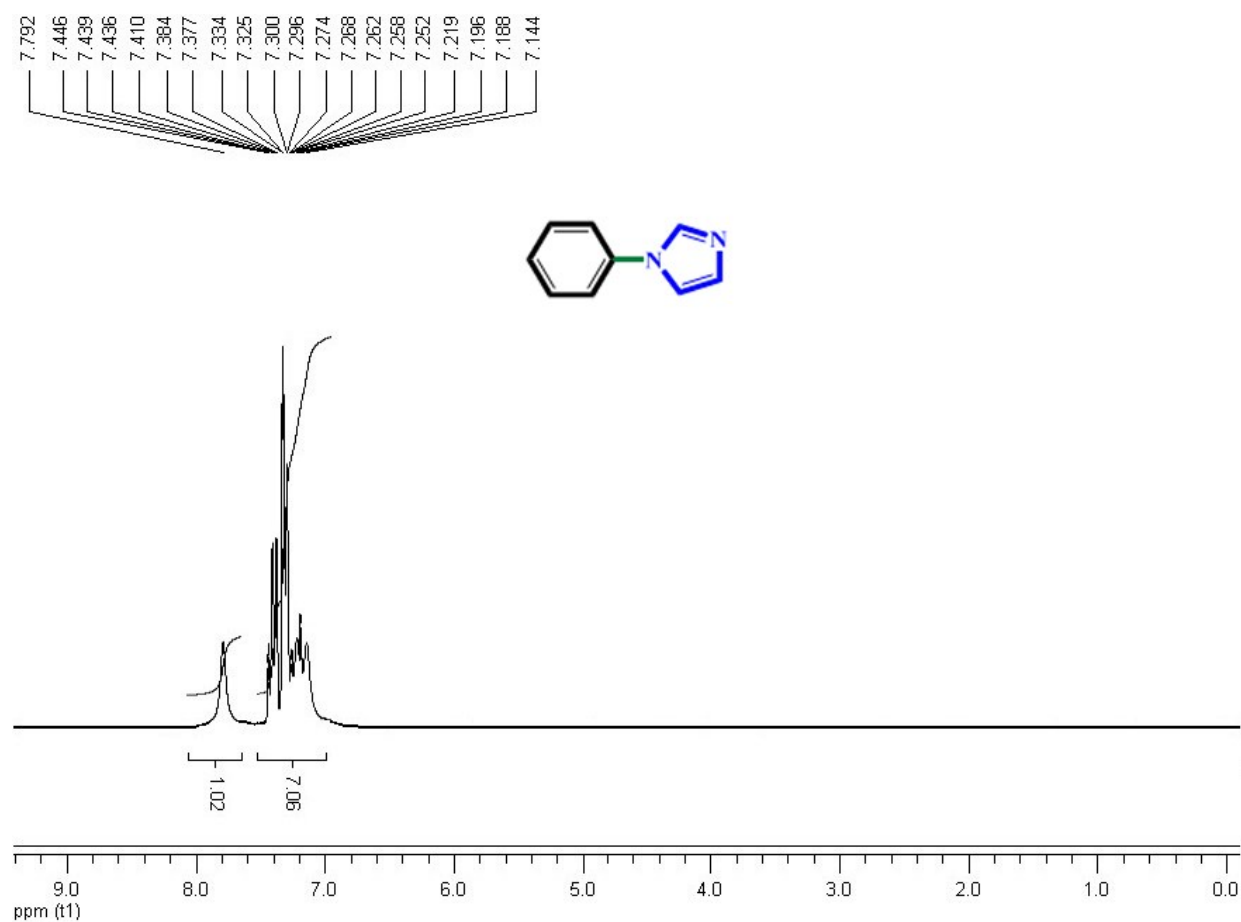

137.389  
136.479  
130.389  
129.873  
127.466  
121.458  
118.218

77.604  
77.097  
76.587

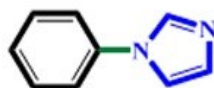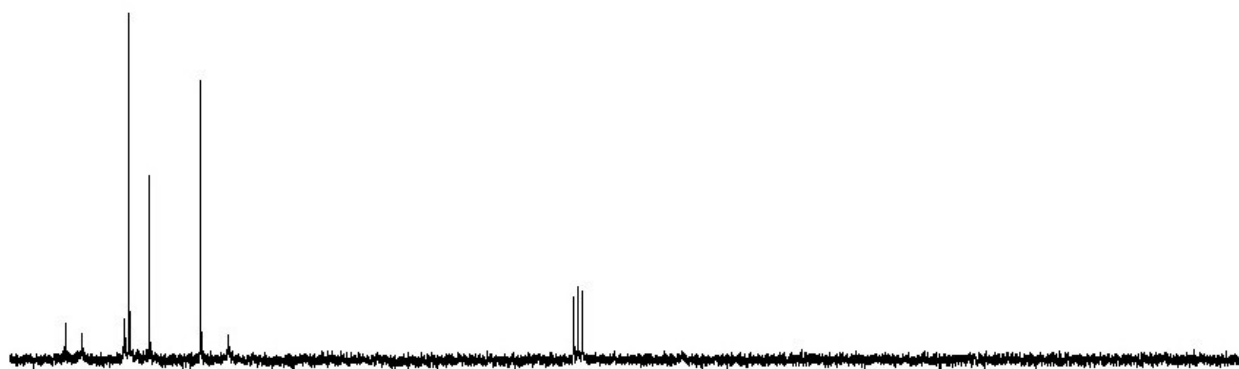

ppm (f1)

100

50

0

8.426  
8.426  
8.414  
8.409  
8.285  
7.797  
7.789  
7.787  
7.766  
7.764  
7.759  
7.734  
7.727  
7.581  
7.342  
7.311  
7.301  
7.279  
7.199  
7.196  
7.186  
7.184  
7.173  
7.170  
7.153  
7.150  
7.140

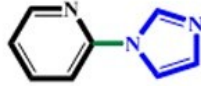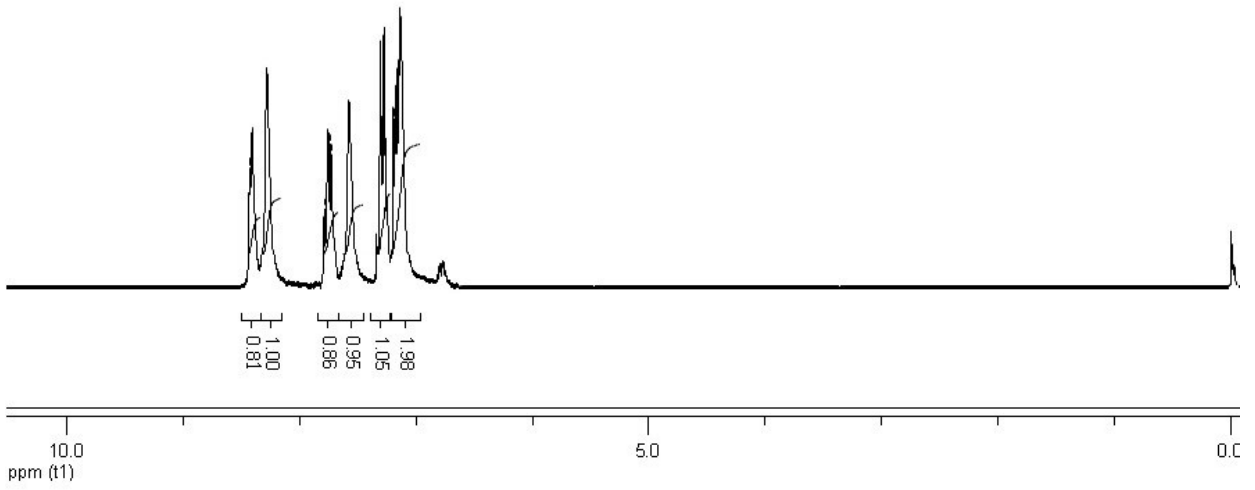

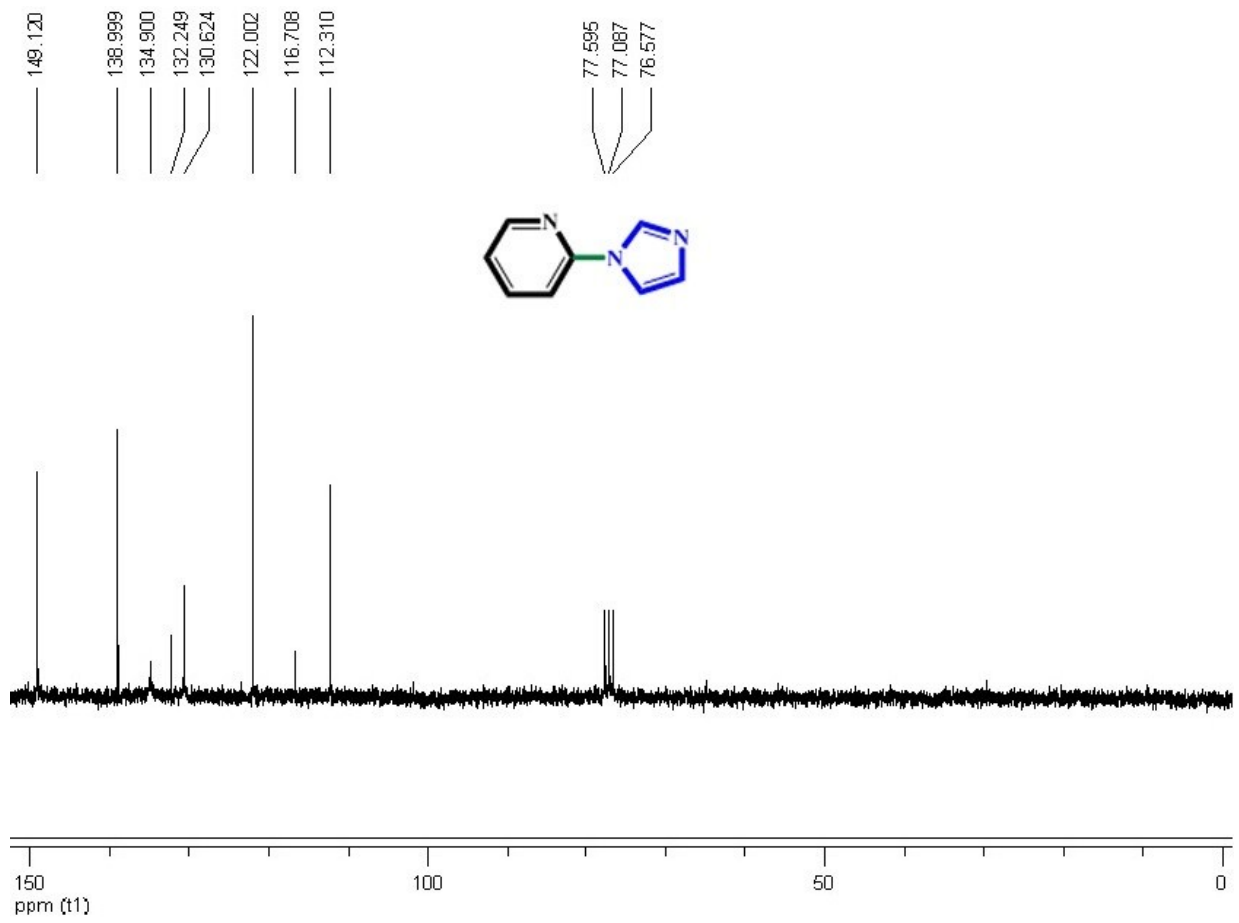



7.644  
7.639  
7.629  
7.618  
7.598  
7.590  
7.520  
7.507  
7.490  
7.480  
7.476  
7.469  
7.453  
7.437  
7.432  
7.421  
7.415  
7.297  
7.285  
7.280  
7.272  
7.263  
7.250  
7.168  
7.141  
7.137  
7.117  
7.109  
7.086  
7.081  
7.058  
6.628  
6.615  
6.610  
6.607  
6.597  
6.594

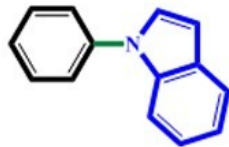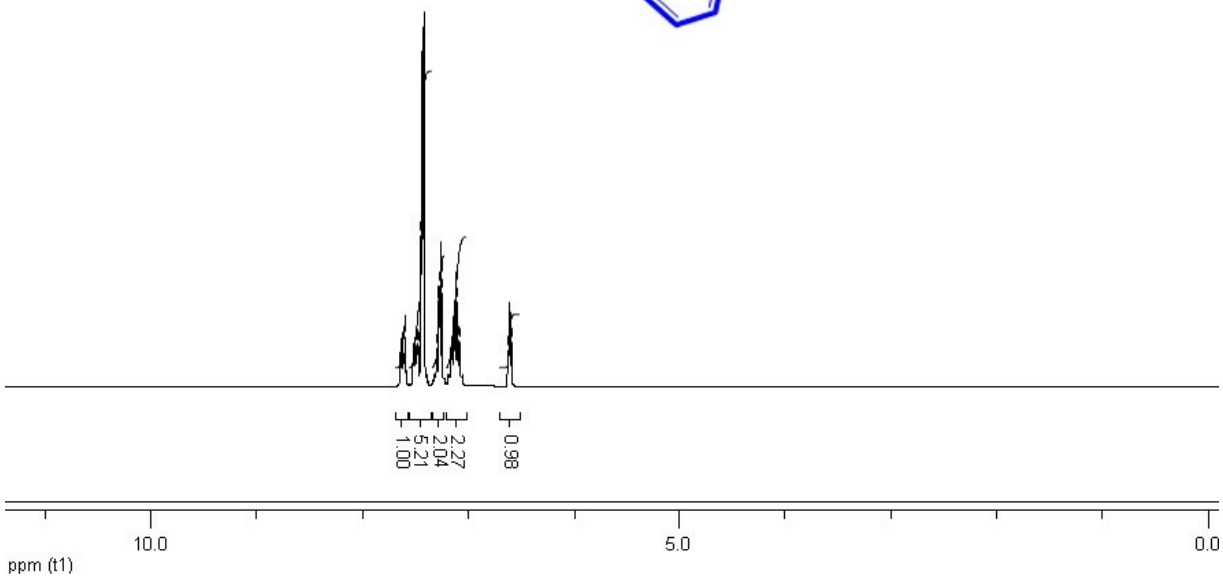

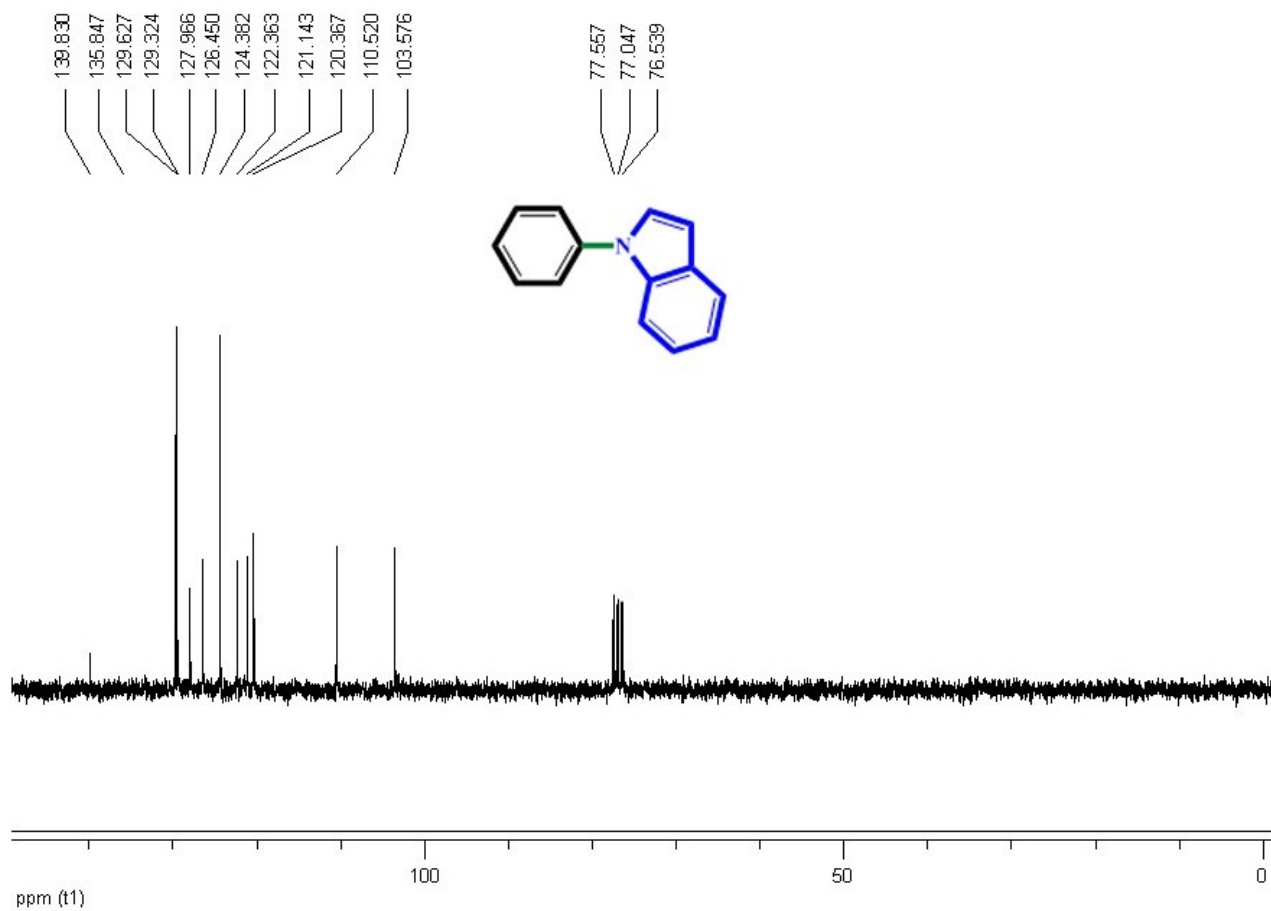

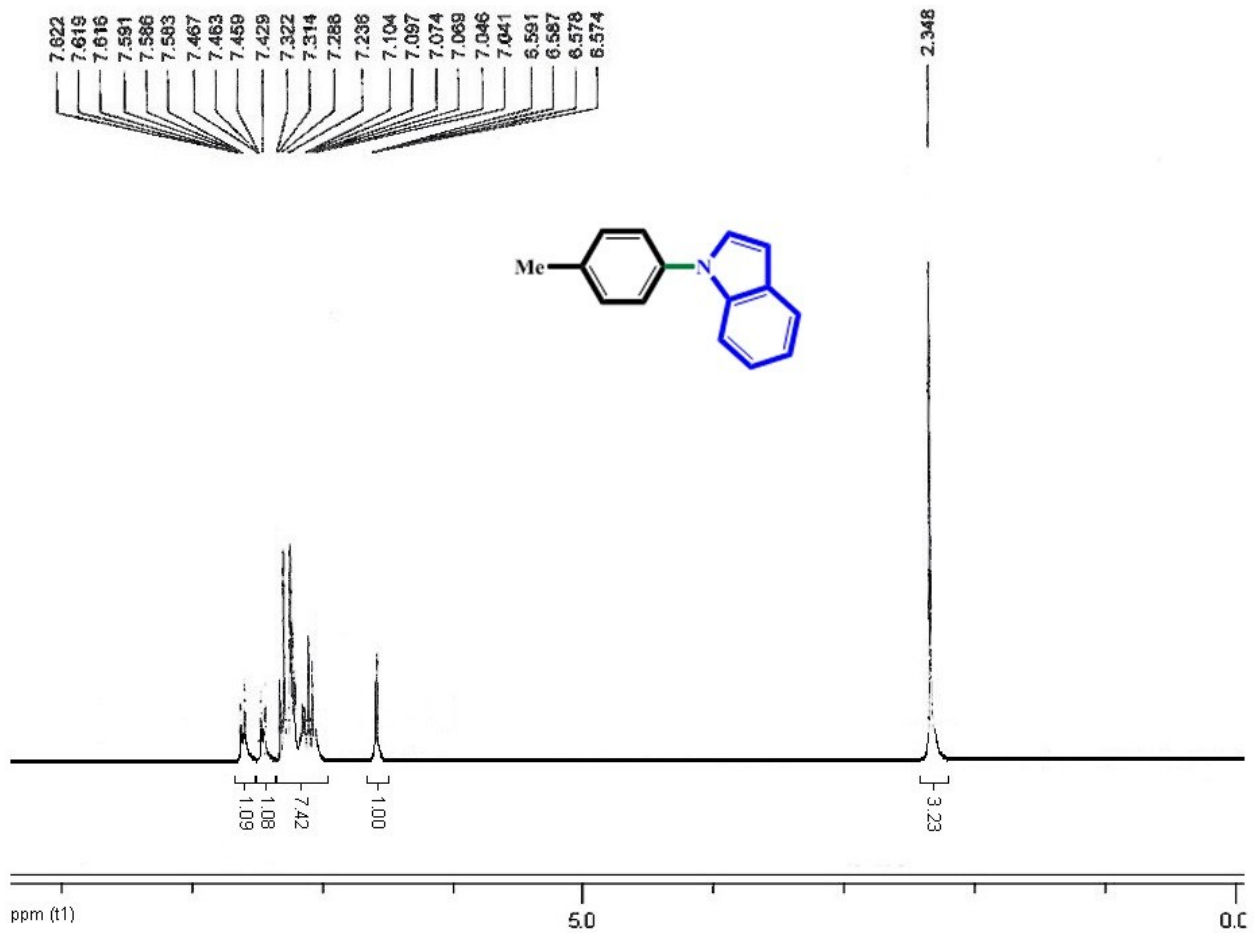

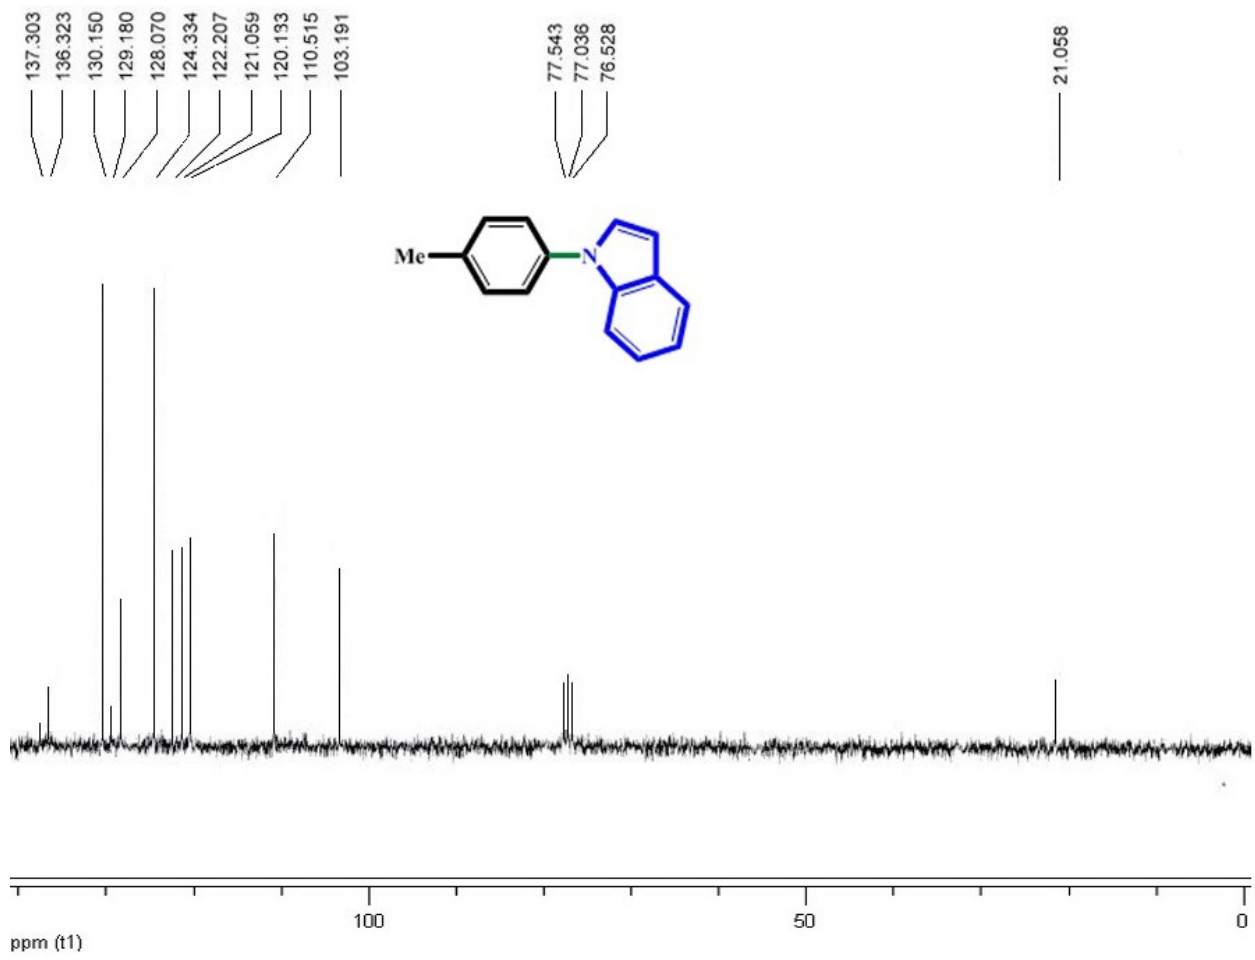

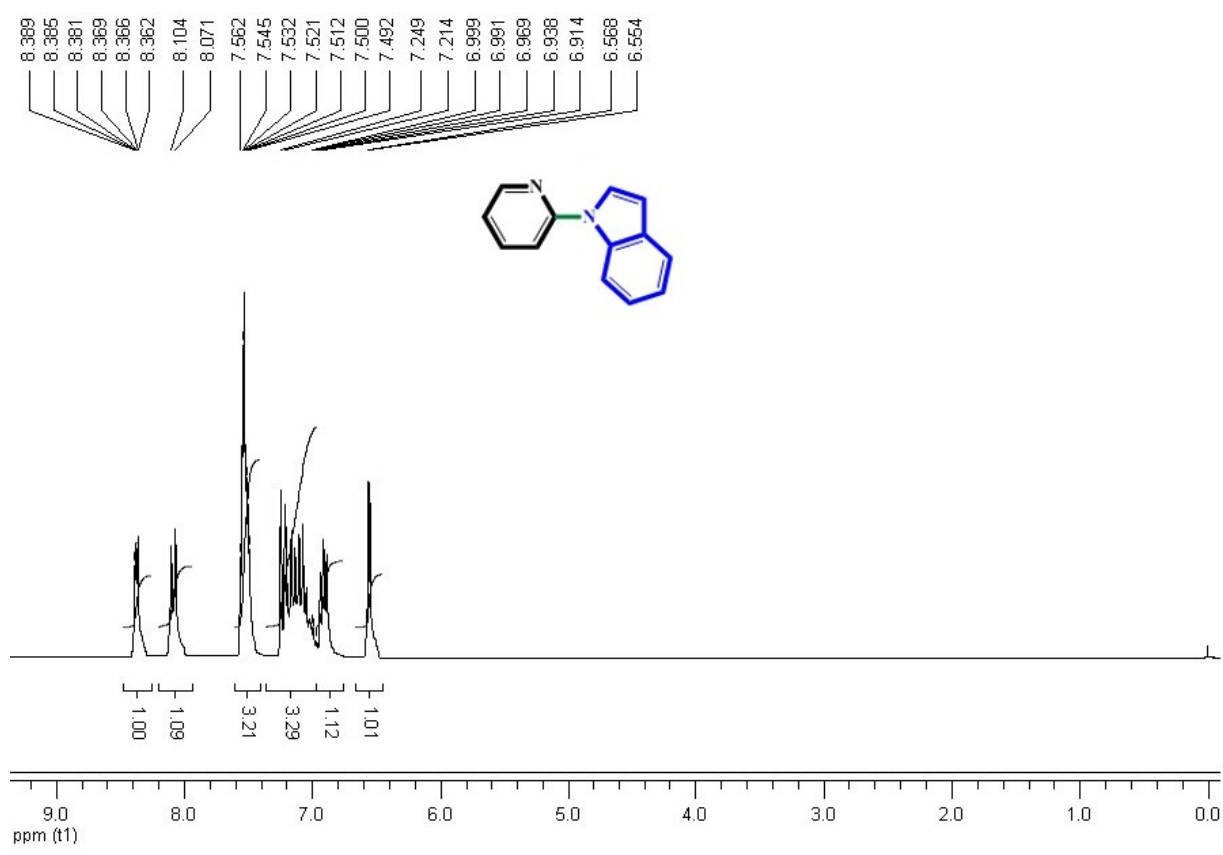

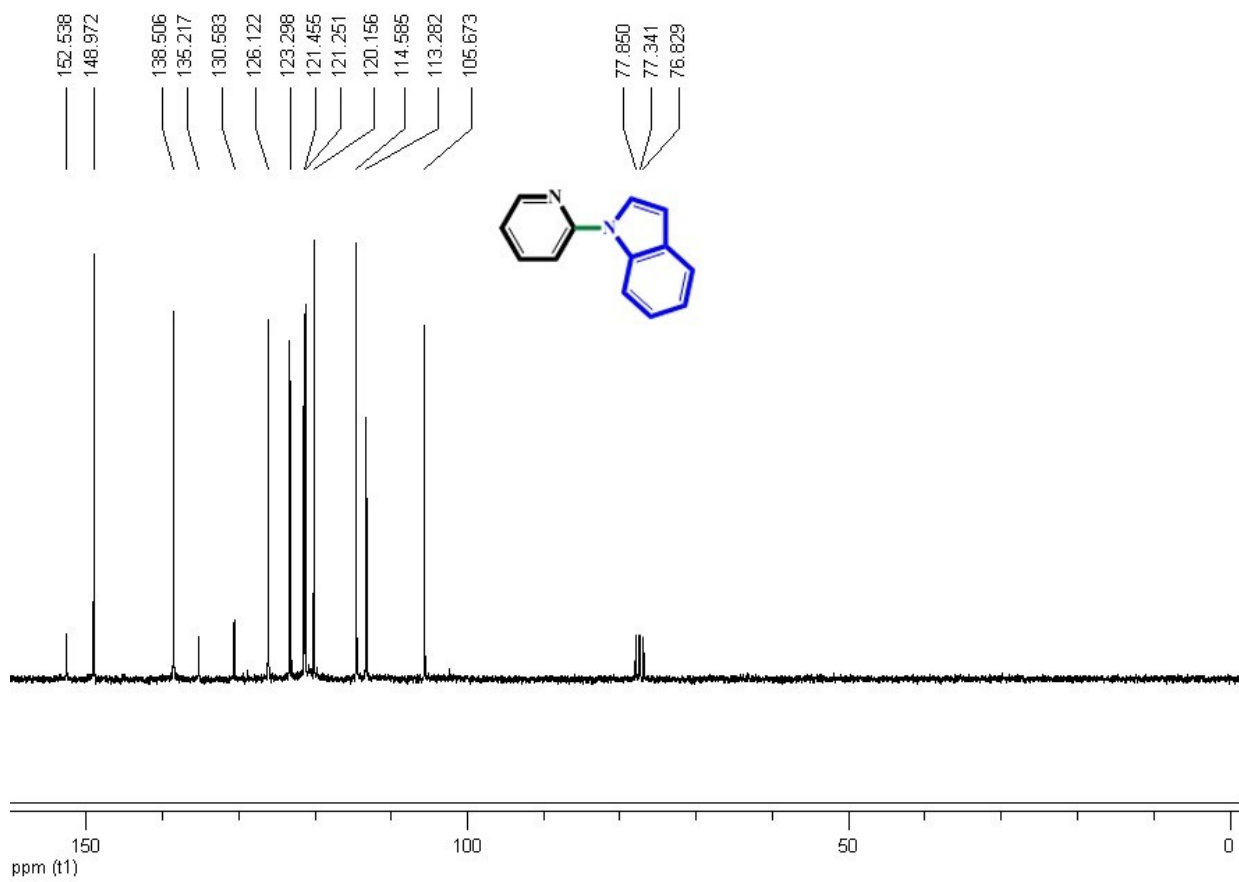

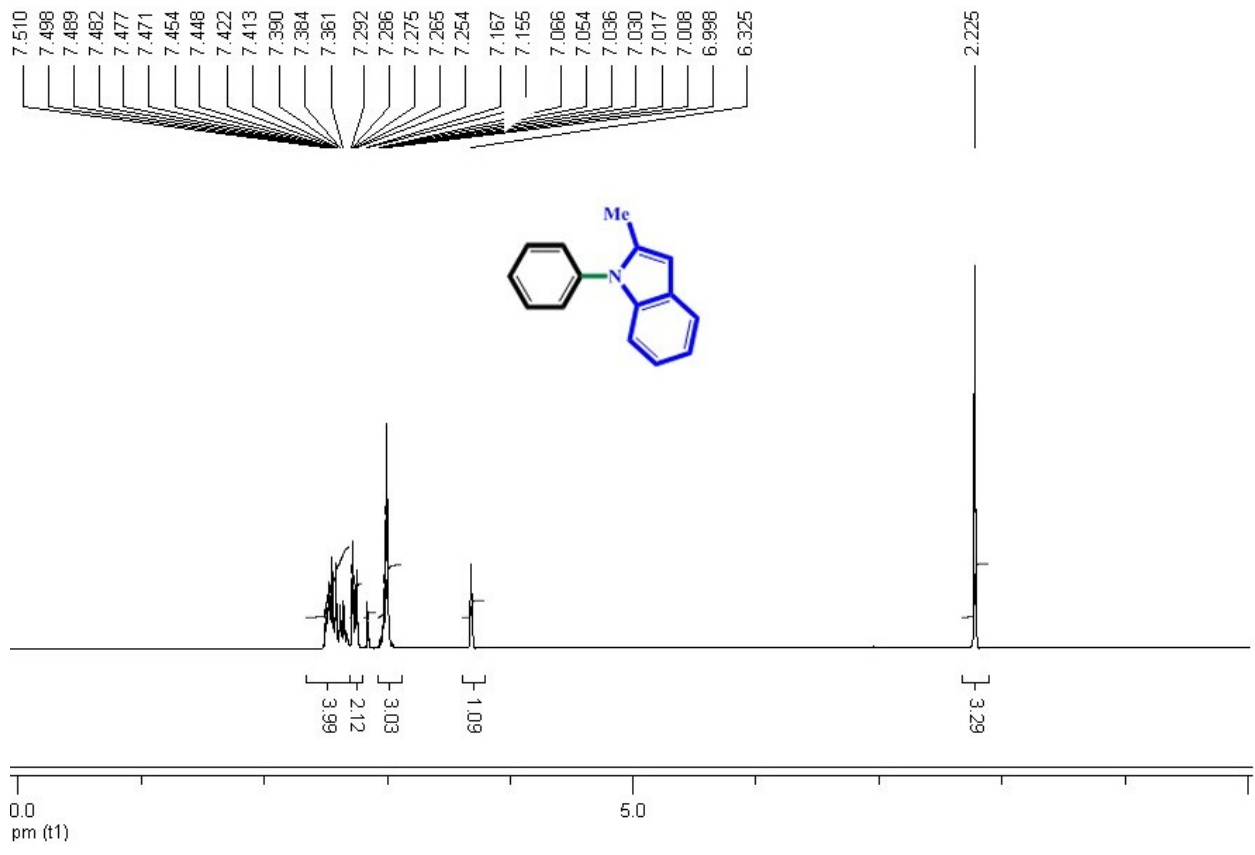

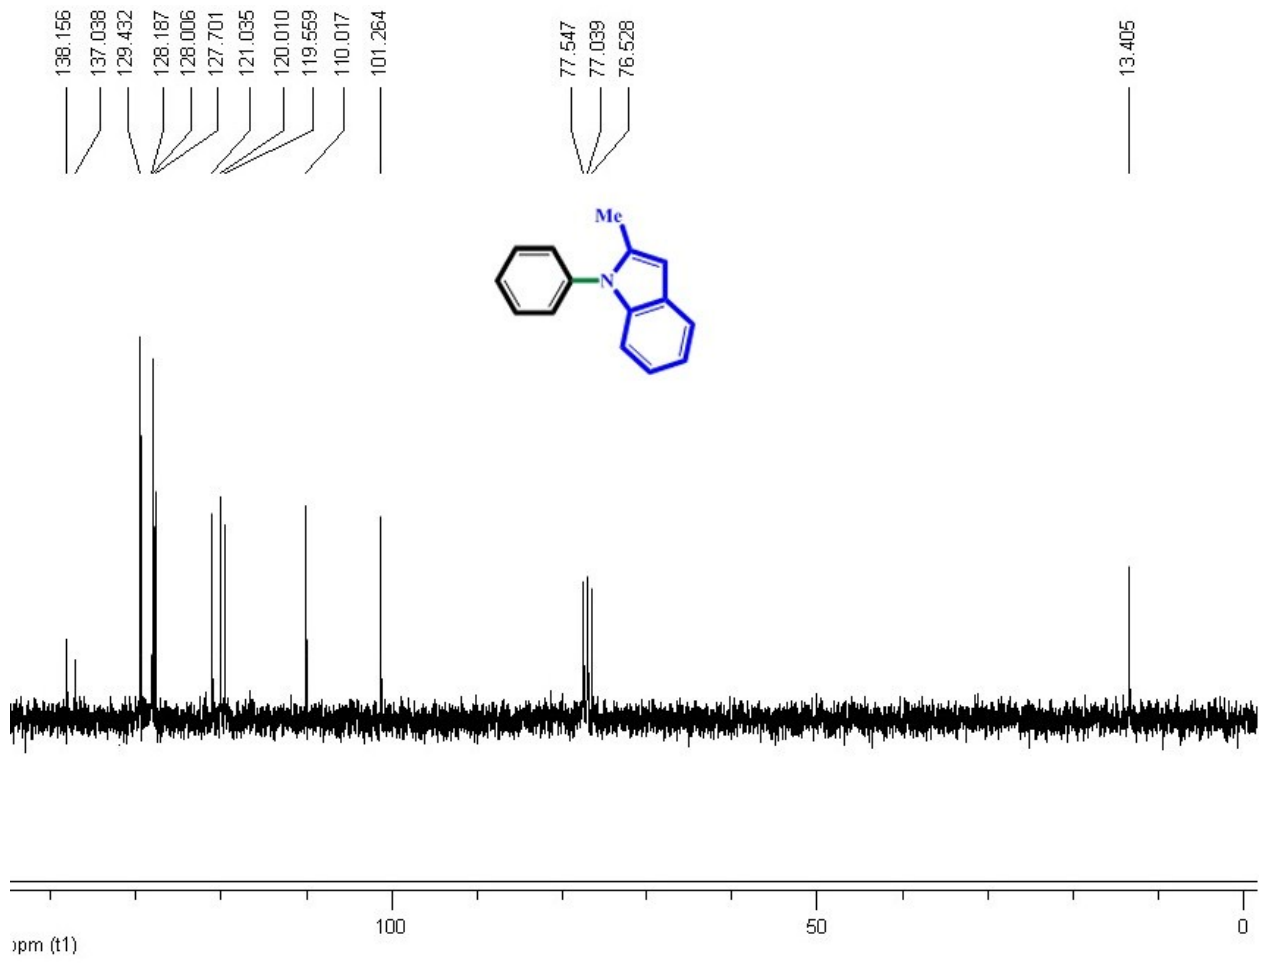



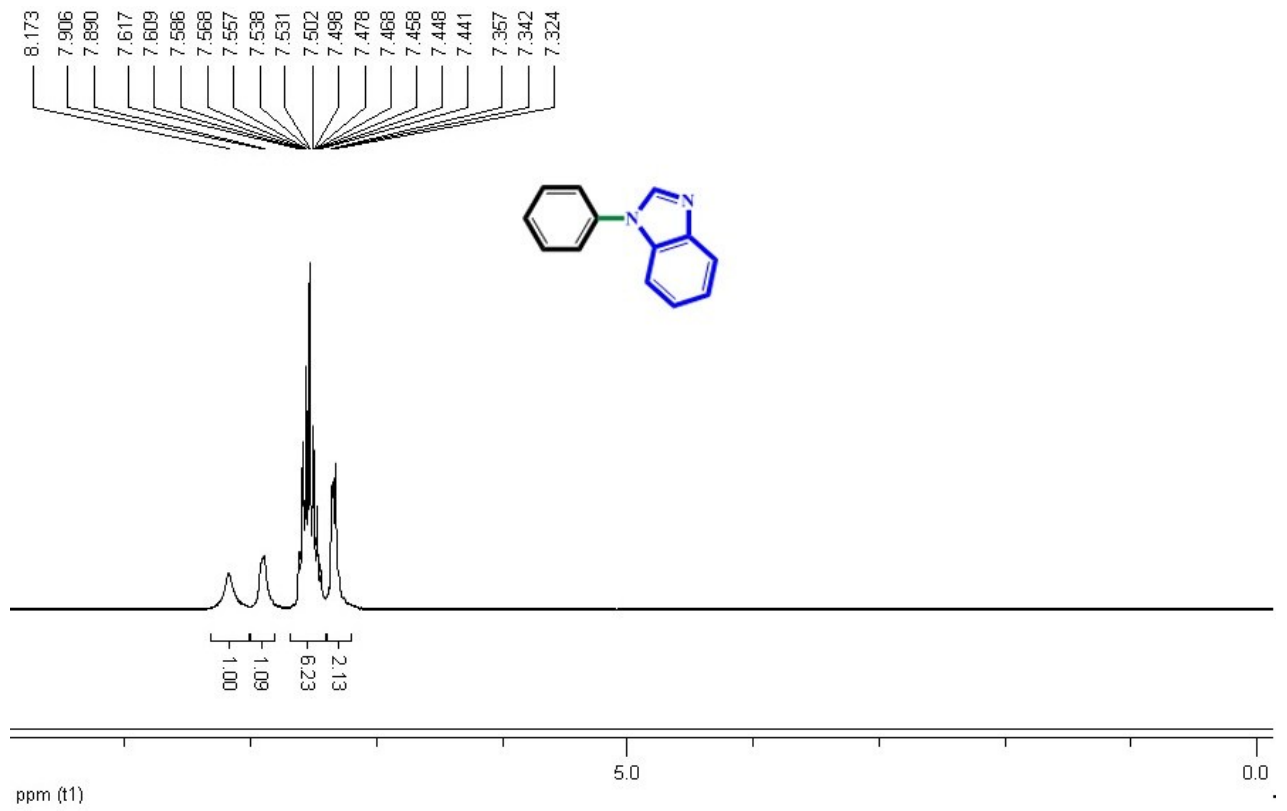

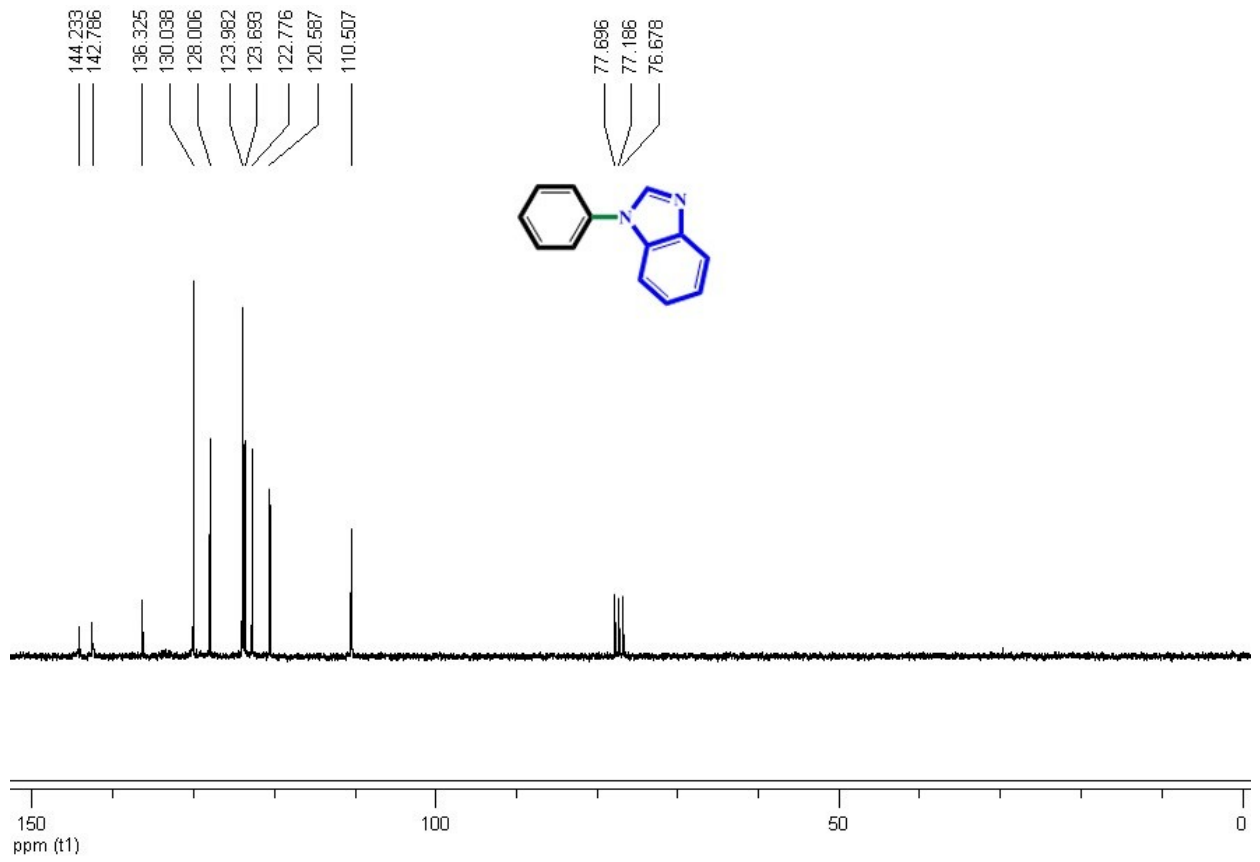

8.622  
8.617  
8.614  
8.605  
8.602  
8.576  
8.078  
8.047  
7.935  
7.929  
7.905  
7.902  
7.897  
7.889  
7.880  
7.873  
7.867  
7.861  
7.593  
7.560  
7.390  
7.385  
7.377  
7.372  
7.361  
7.354  
7.348  
7.323  
7.293  
7.282  
7.278  
7.274  
7.265  
7.259

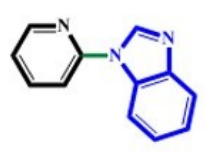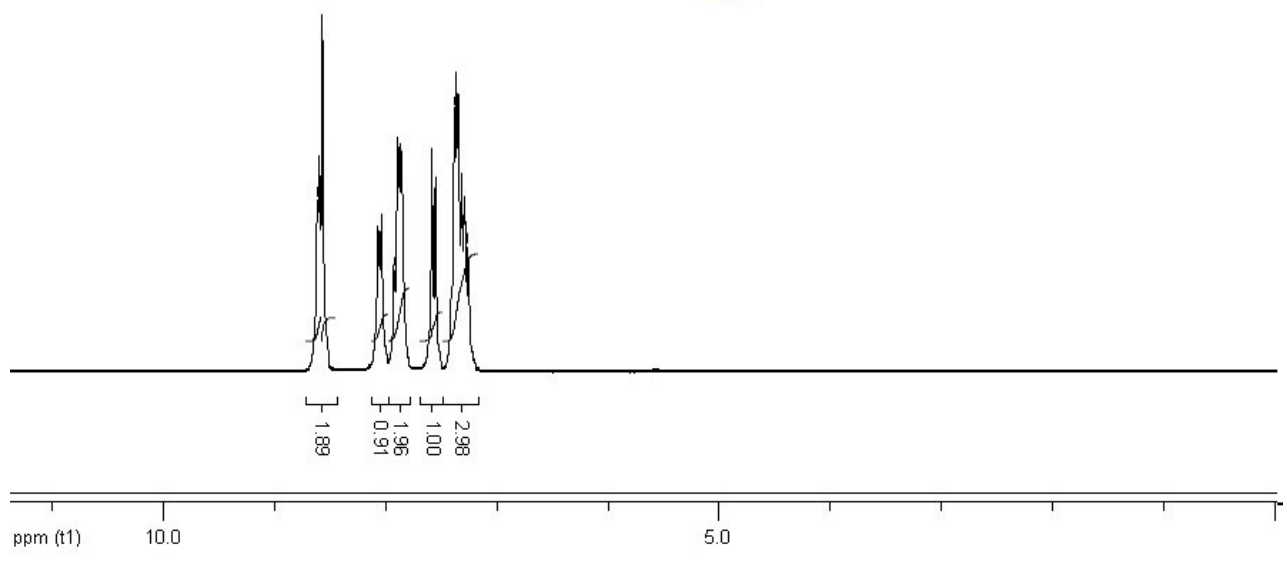

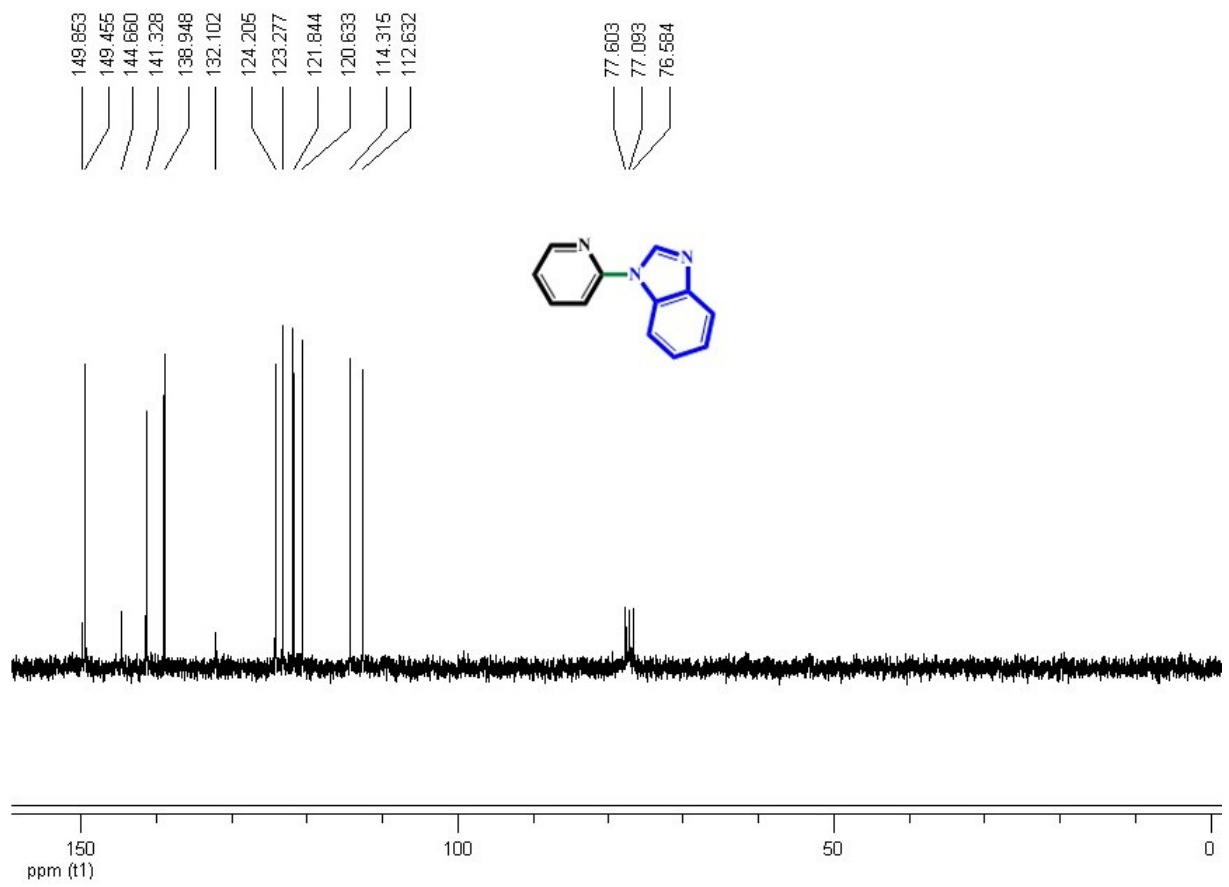

7.328  
7.315  
7.311  
7.304  
7.280  
7.179  
7.169  
7.154  
7.145  
7.133  
7.121  
7.014  
7.005  
6.996  
6.275  
6.266  
6.257

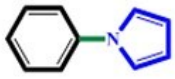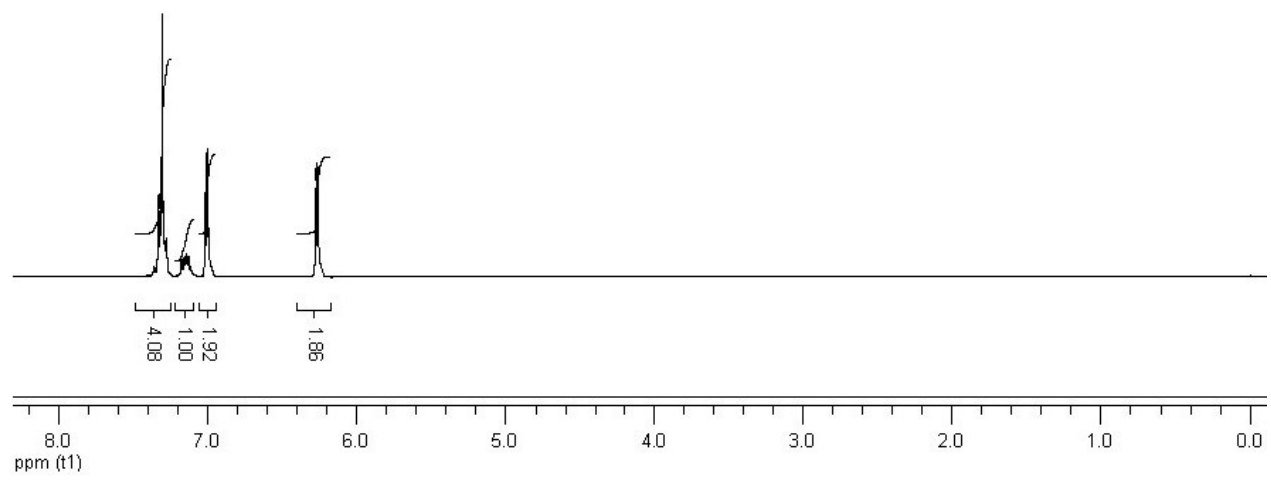

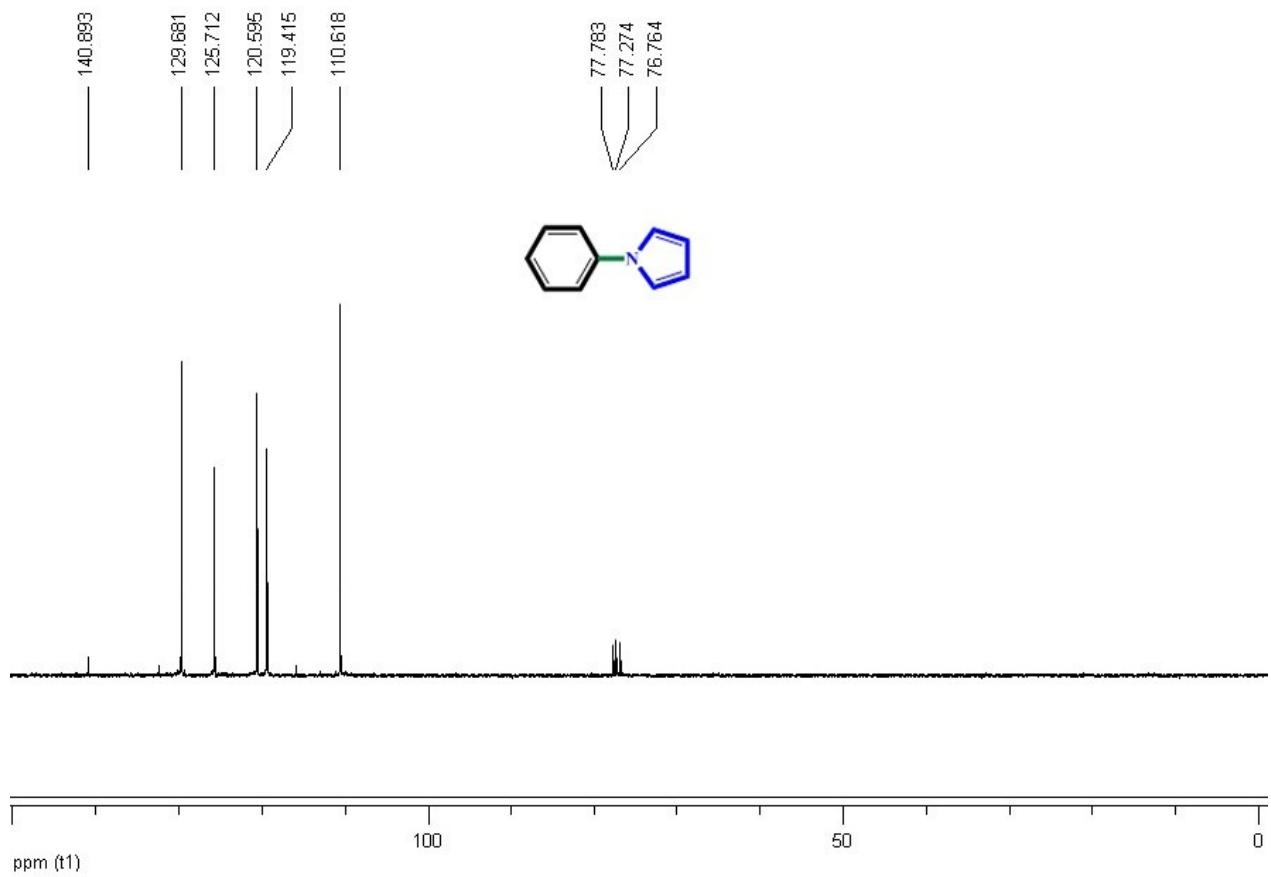

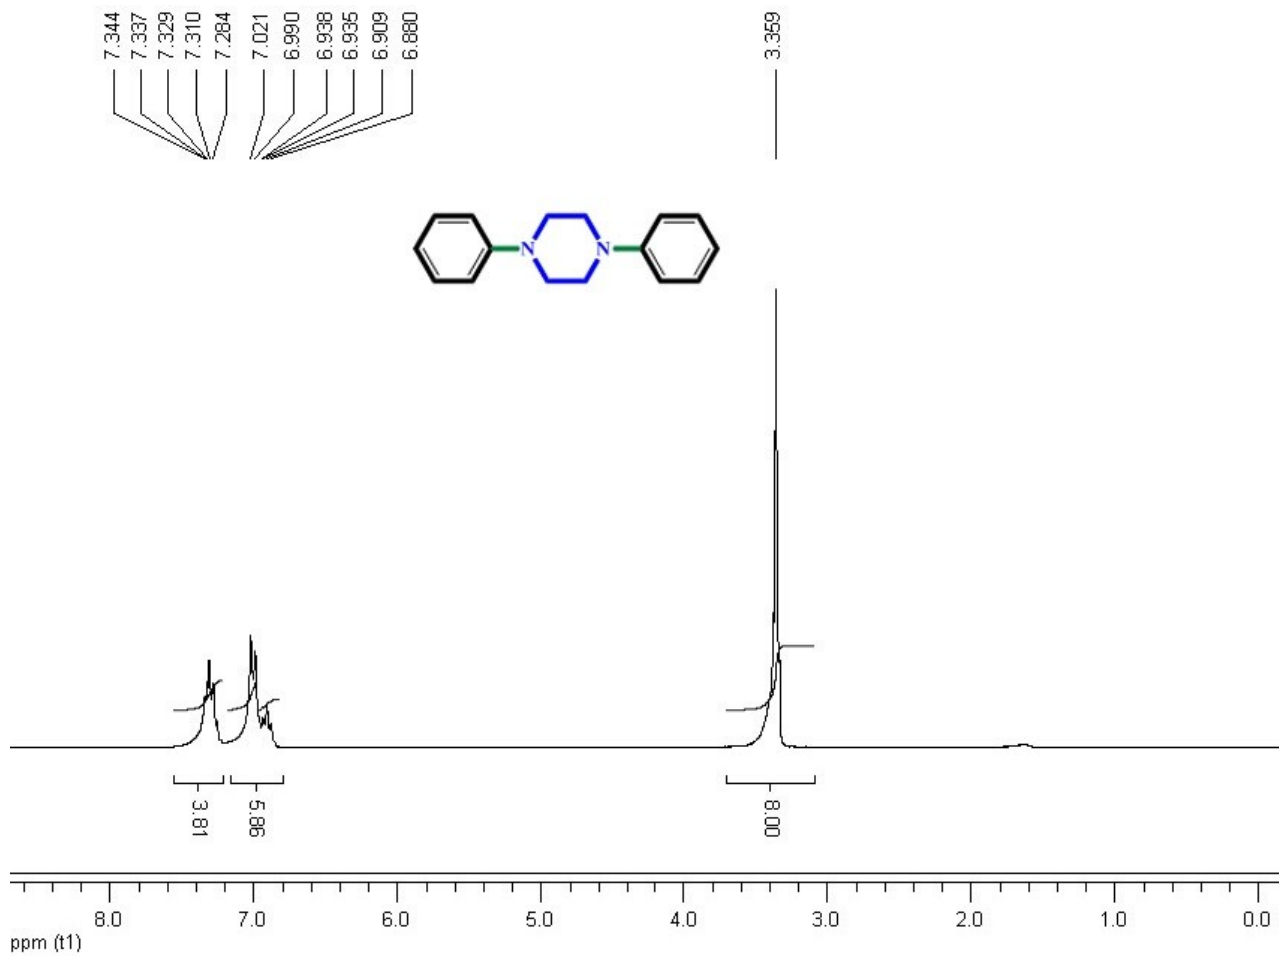

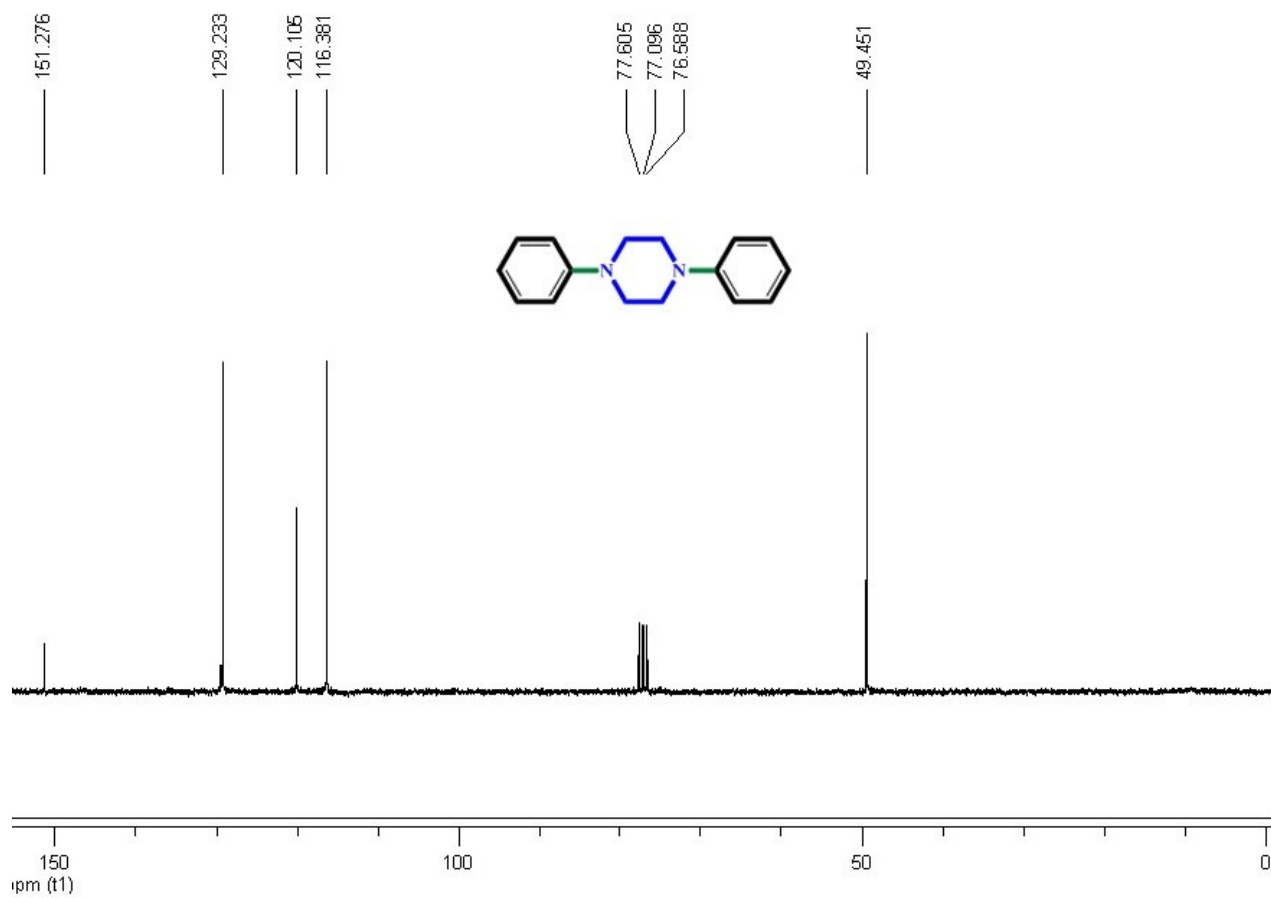



8.161  
8.156  
8.153  
8.145  
8.141  
8.137  
7.474  
7.466  
7.445  
7.439  
7.432  
7.411  
7.403  
7.255  
7.226  
7.220  
7.199  
7.193  
7.185  
6.931  
6.900  
6.848  
6.819  
6.790  
6.653  
6.618  
6.610  
6.599  
6.590  
6.587  
6.581  
6.561  
3.656  
3.636  
3.615  
3.260  
3.247  
3.239  
3.219

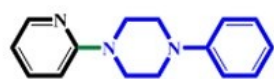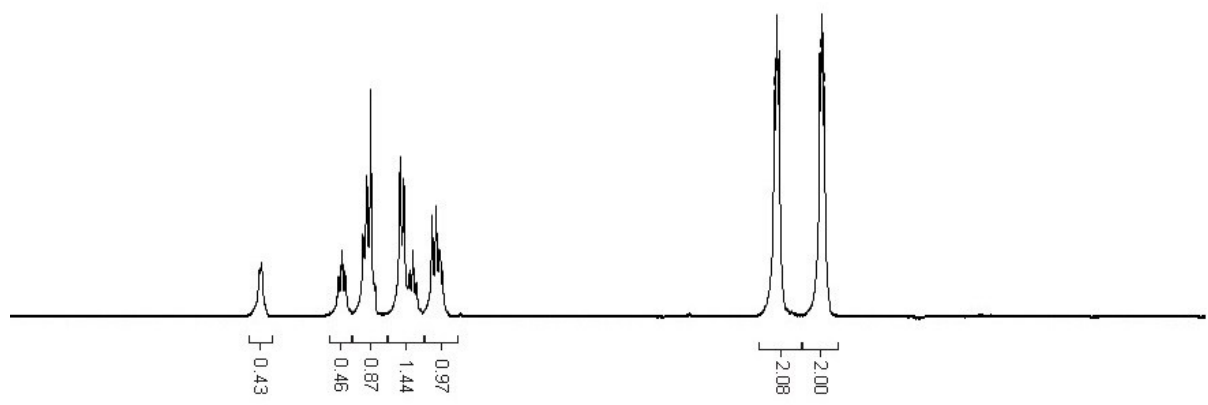

10.0  
ppm (t1)  
5.0  
0.0

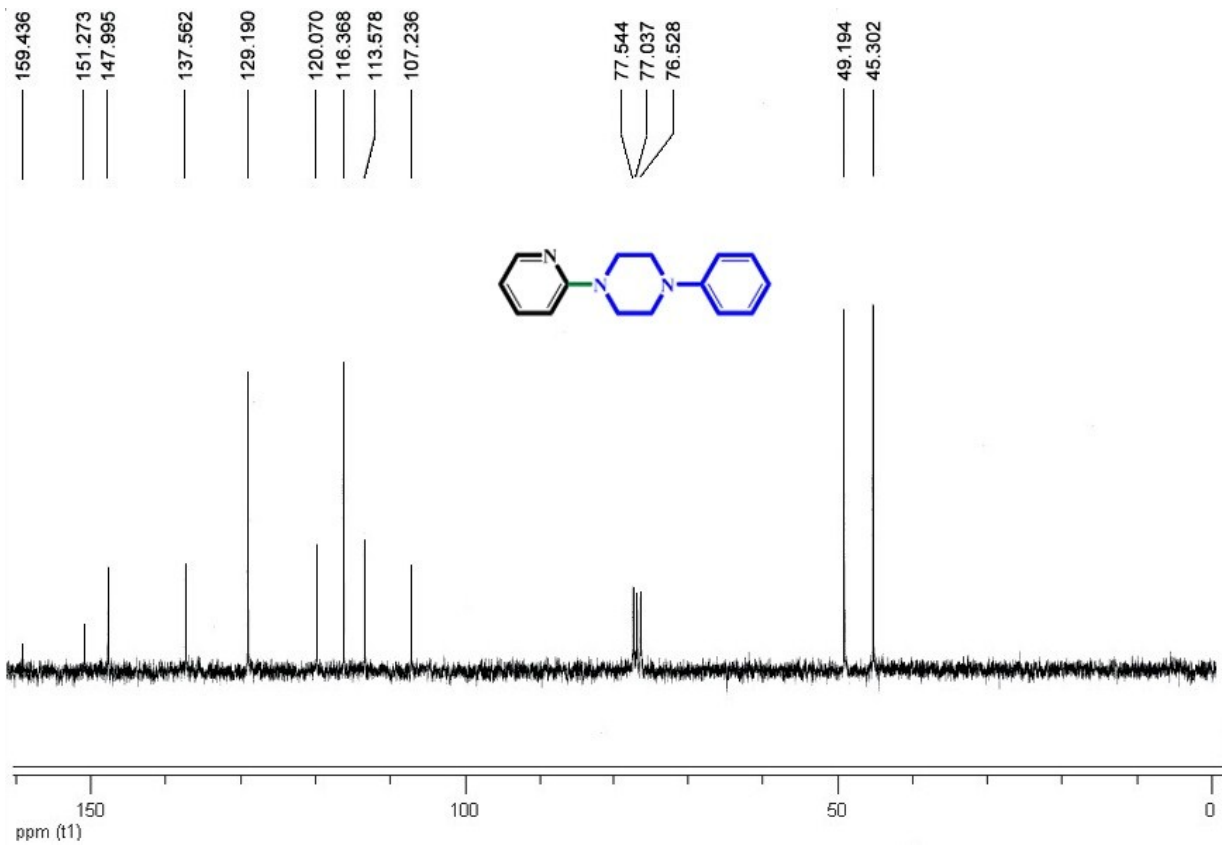

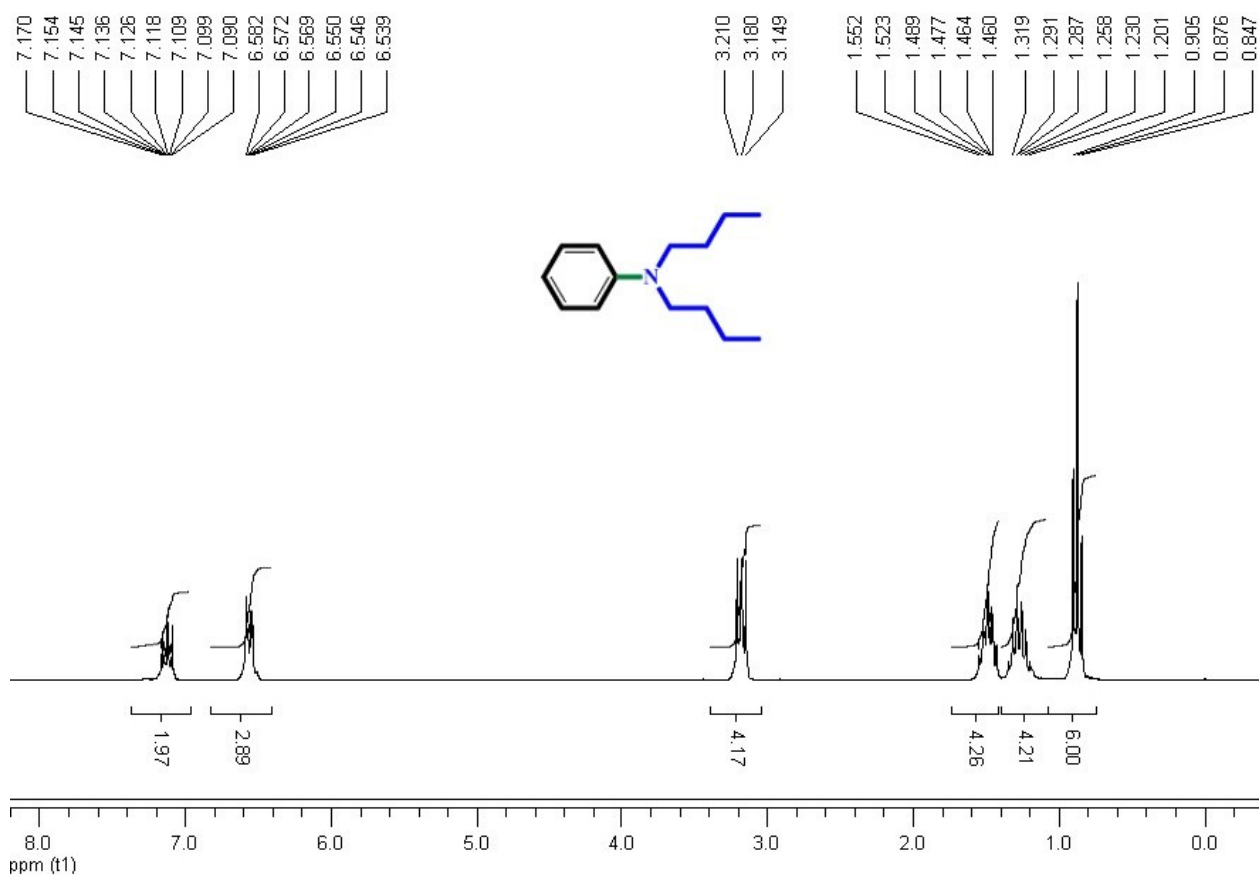

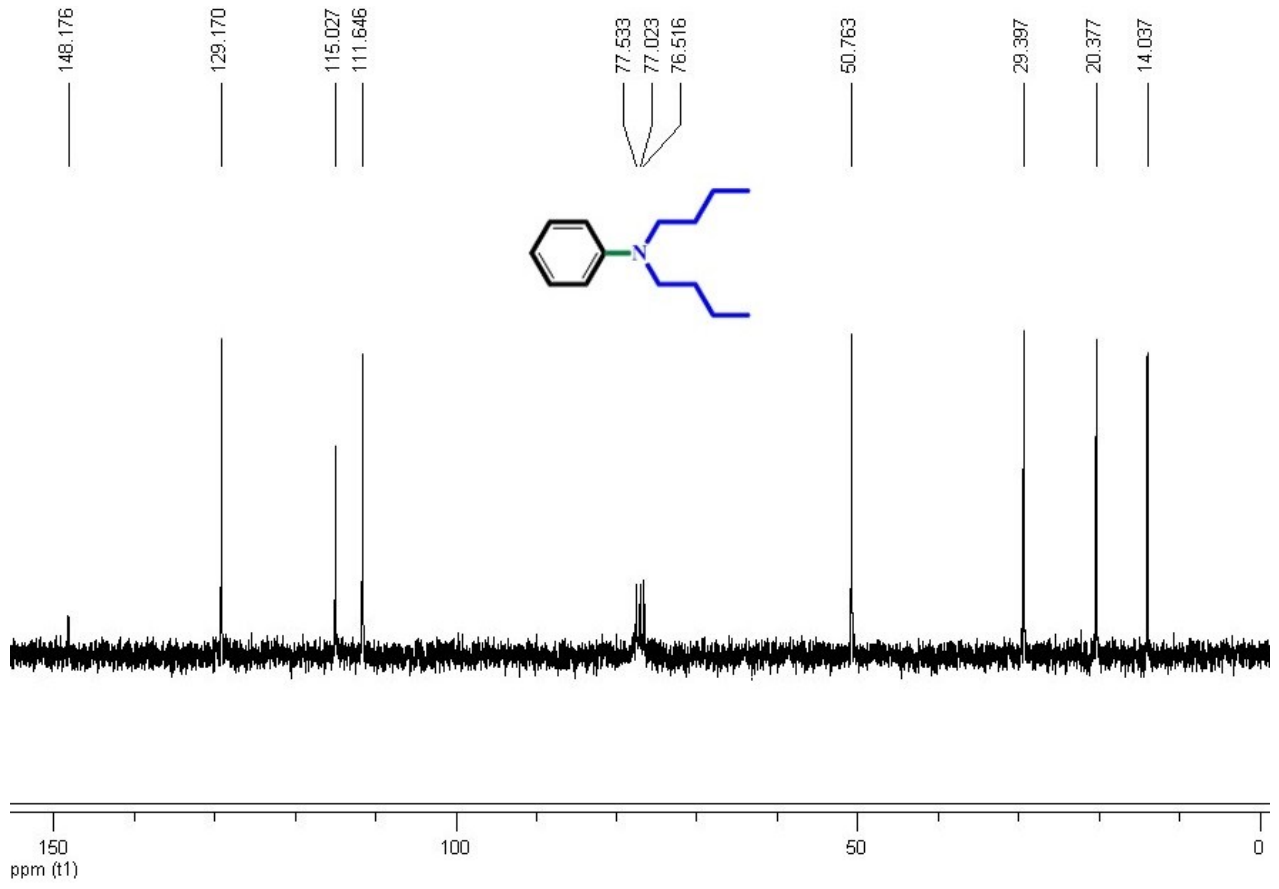

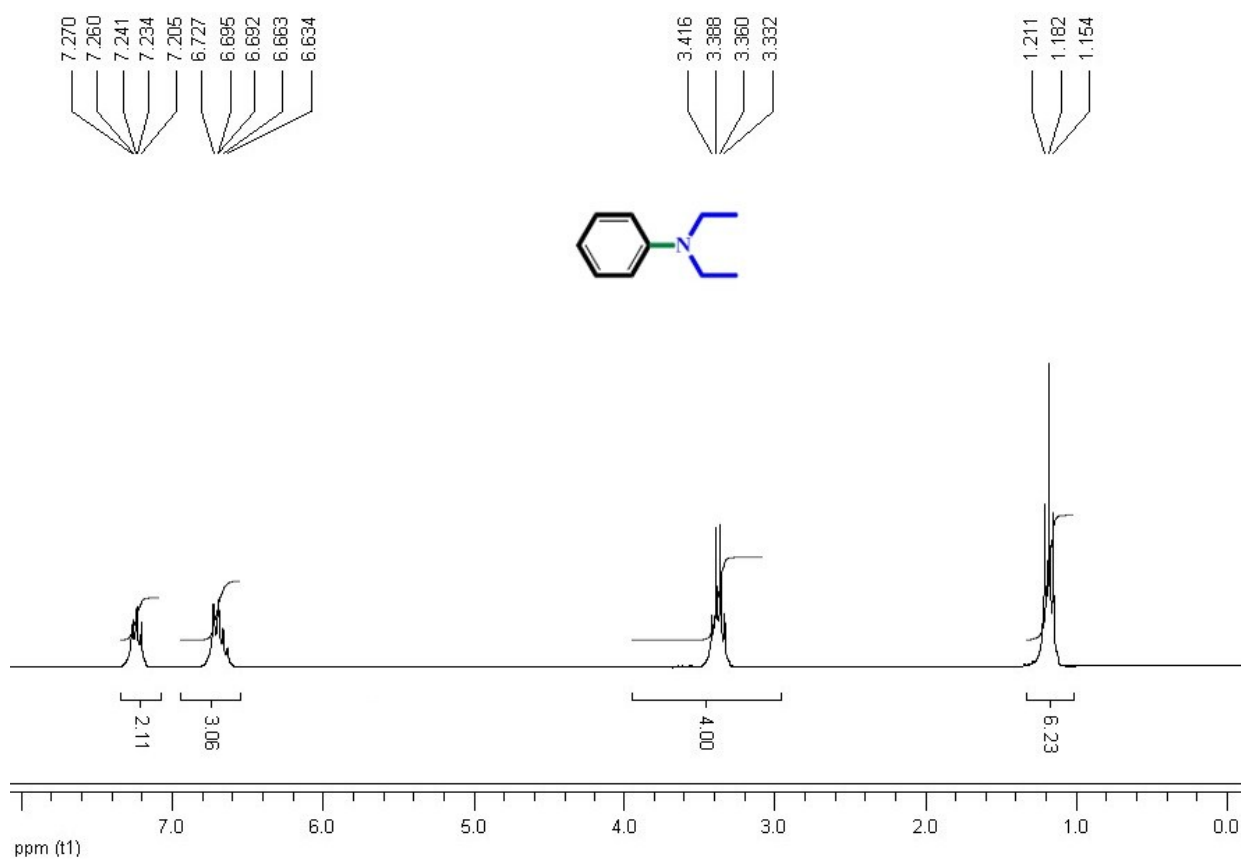

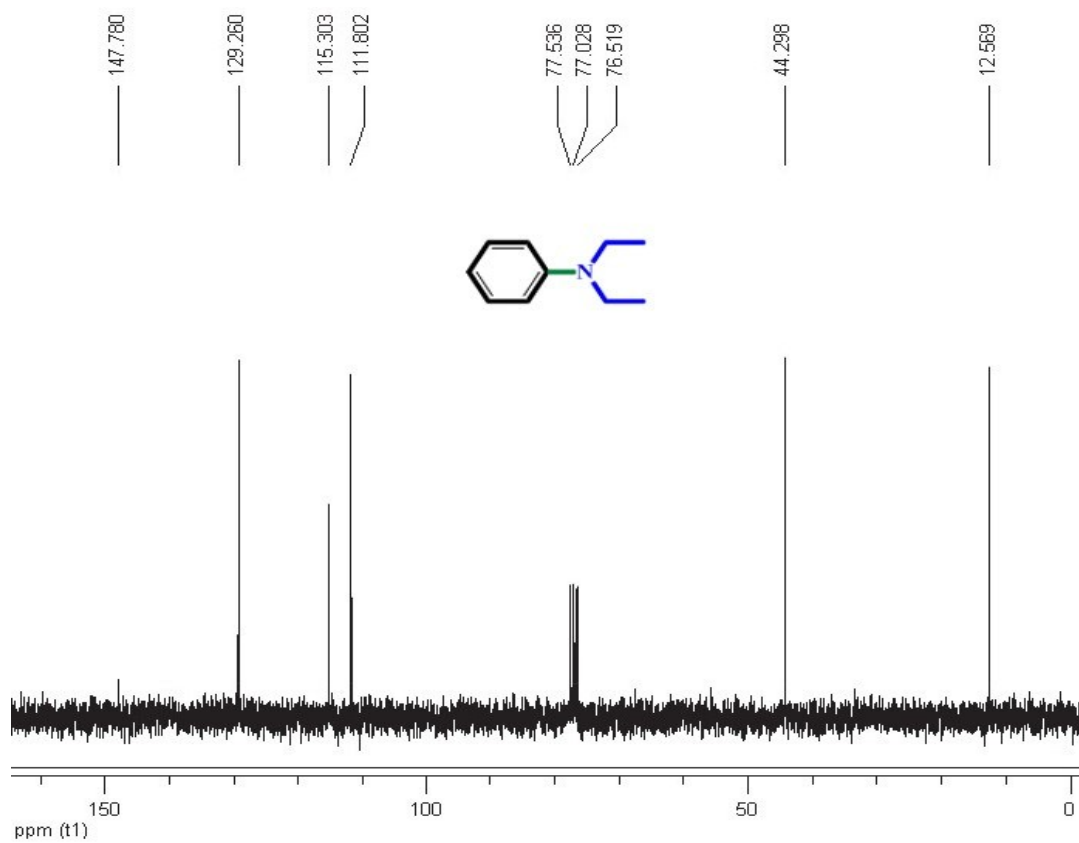

Supplement: c6ra16646f1.pdf [file c6ra16646f1.pdf]
